# Supplementary material for: Vitamin D and K Supplementation Is Associated with Changes in the Methylation Profile of U266-Multiple Myeloma Cells, Influencing the Proliferative Potential and Resistance to Bortezomib
Source: Nutrients. 2023 Dec 31;16(1):142. doi: 10.3390/nu16010142 (PMC10780809; doi:10.3390/nu16010142)
Supplement: Supplementary file 1 [file nutrients-16-00142-s001.zip]

Archive with 4 entries (4 files):
- descriptions for supplementary.pdf
- Figure S1.pdf
- Figure S2.pdf
- Figure S3.pdf
