# Supplementary figures and images for: Vitamin D and K Supplementation Is Associated with Changes in the Methylation Profile of U266-Multiple Myeloma Cells, Influencing the Proliferative Potential and Resistance to Bortezomib
Source: MDPI journal article supplement (doi:10.3390/nu16010142), 2023-12-31

A

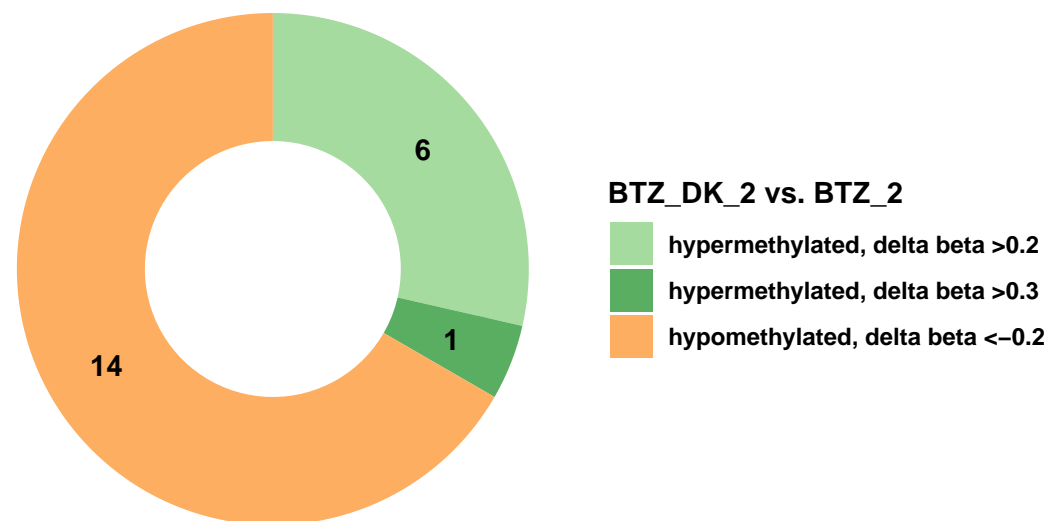

B

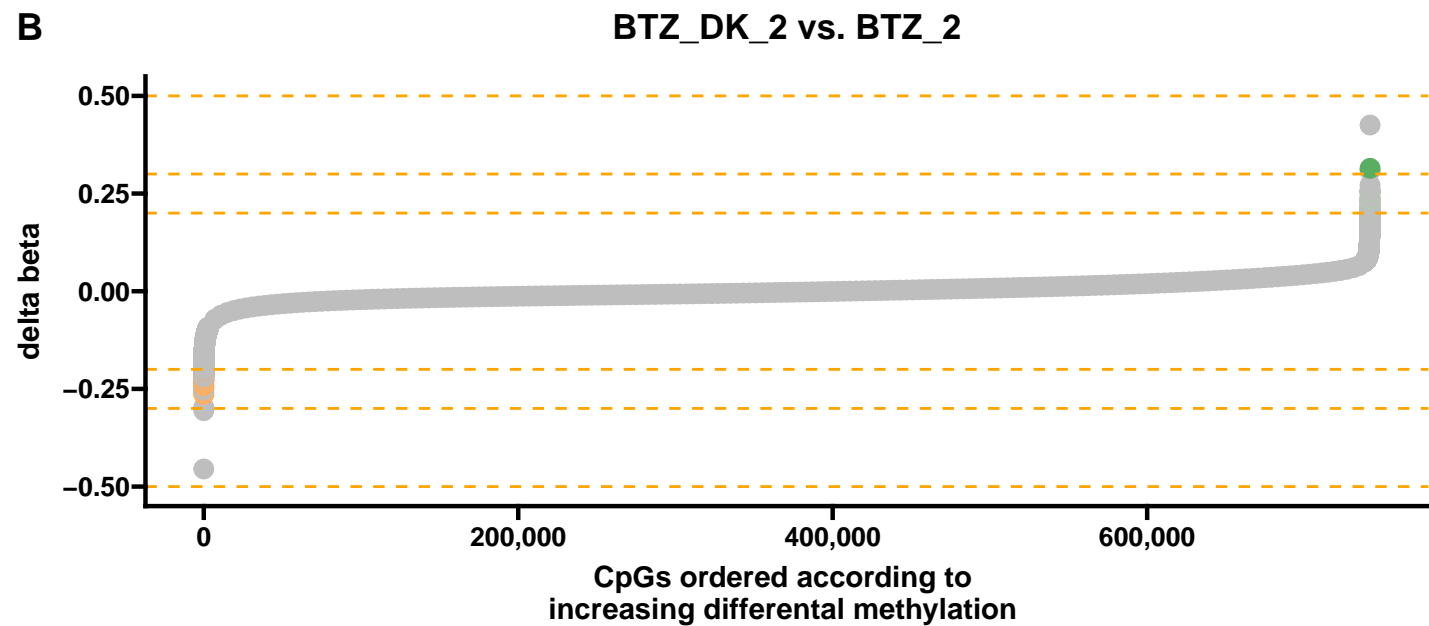

C

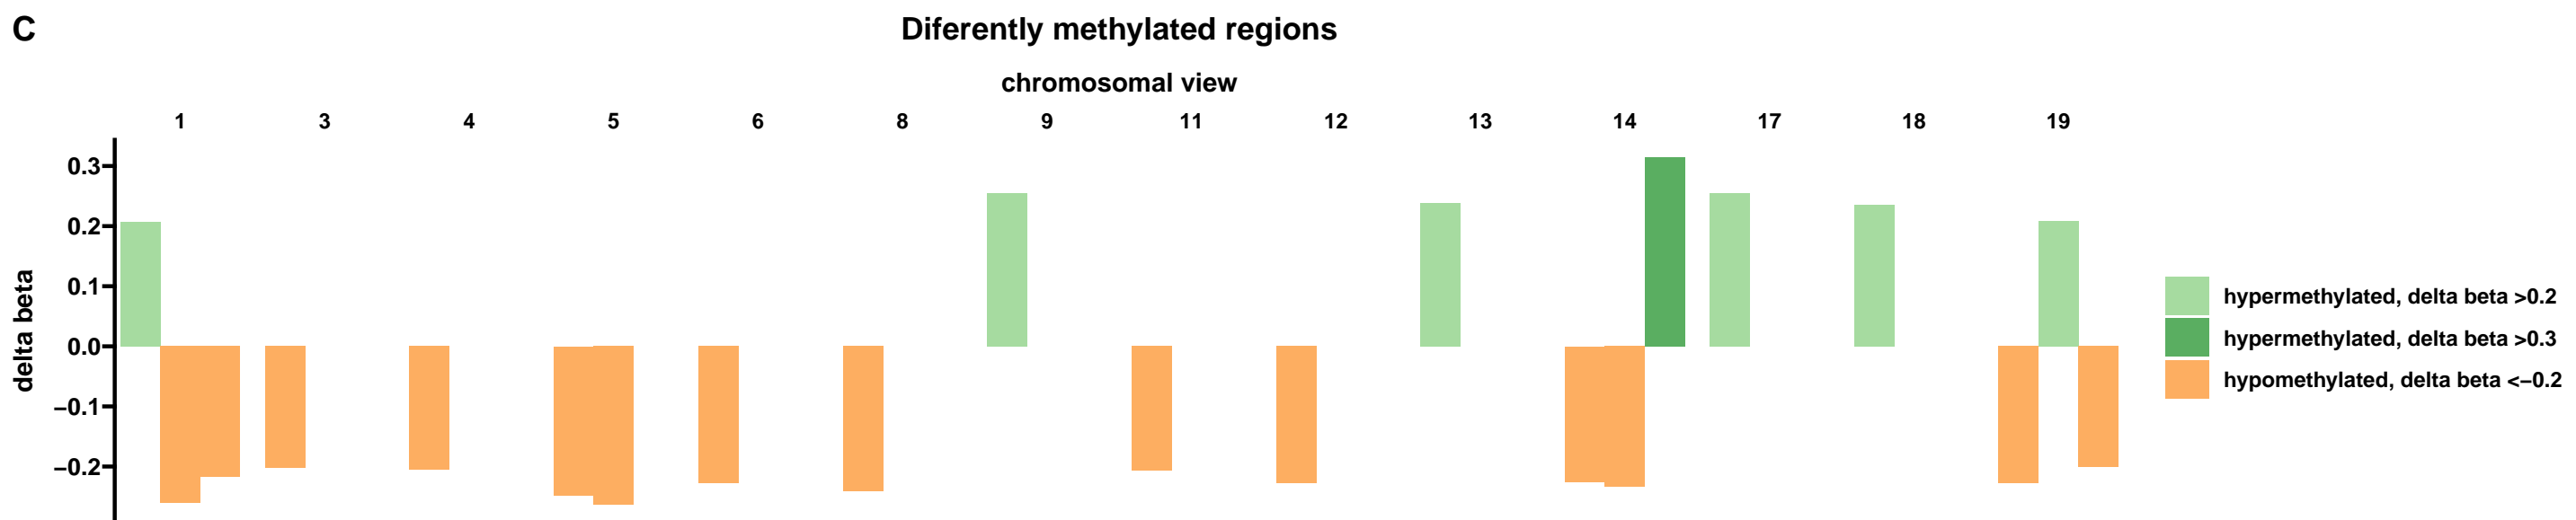

D Relative to CpG islands

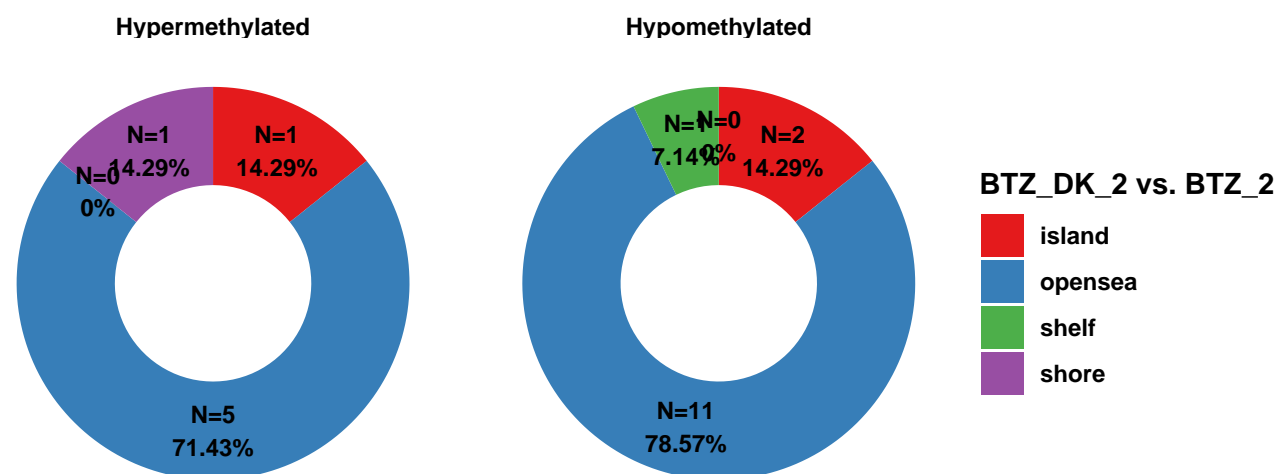

E Relative to TSS

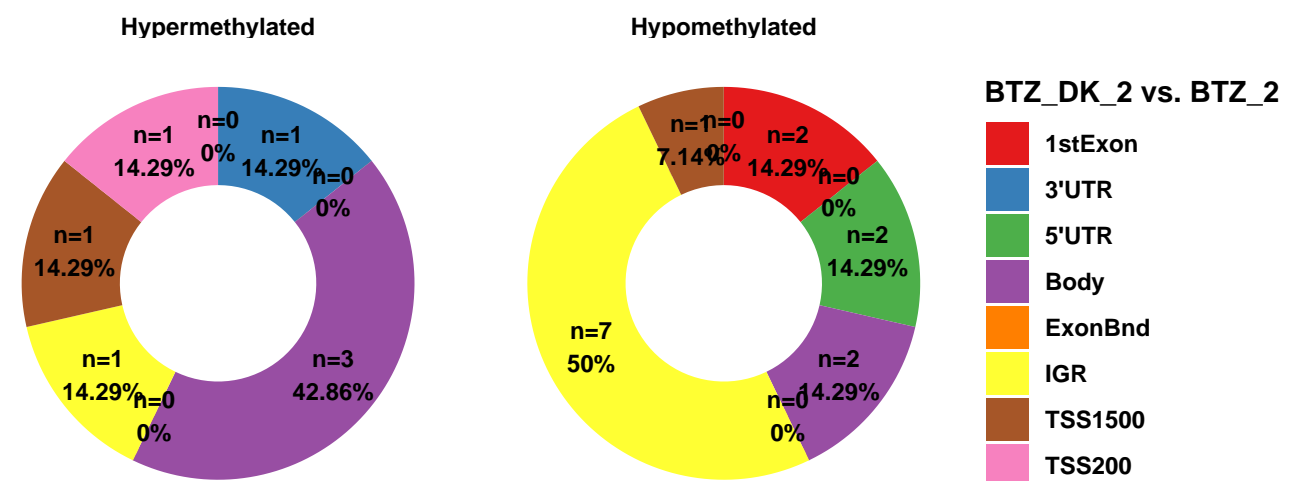

Supplement: s1 [file s1]

A

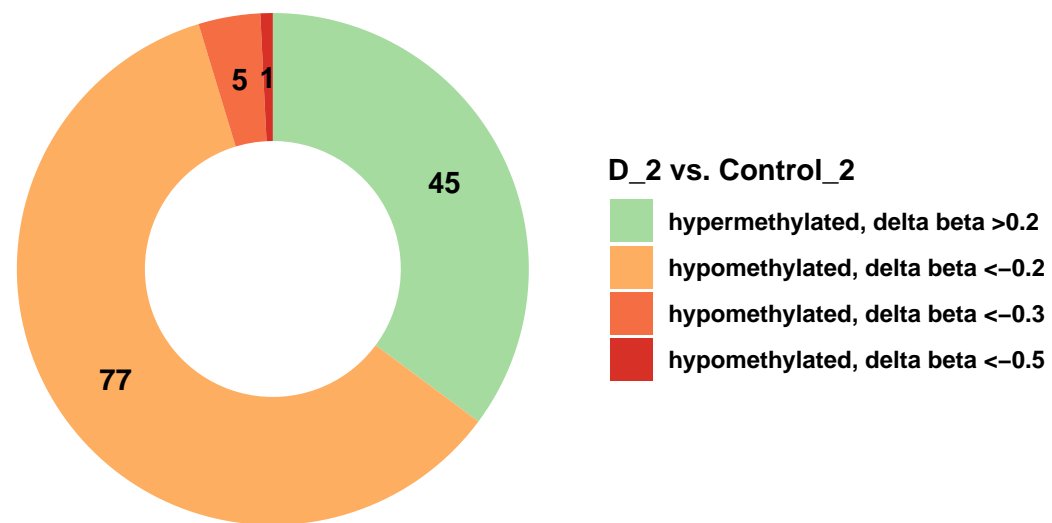

B

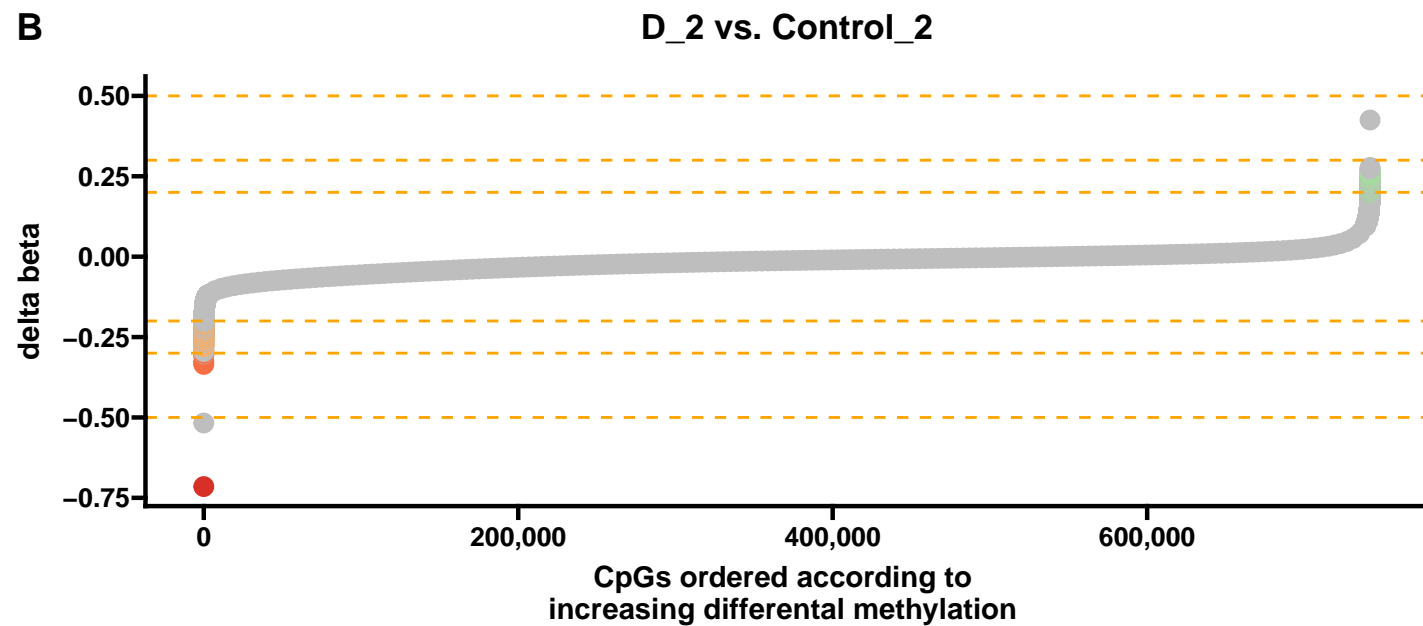

C

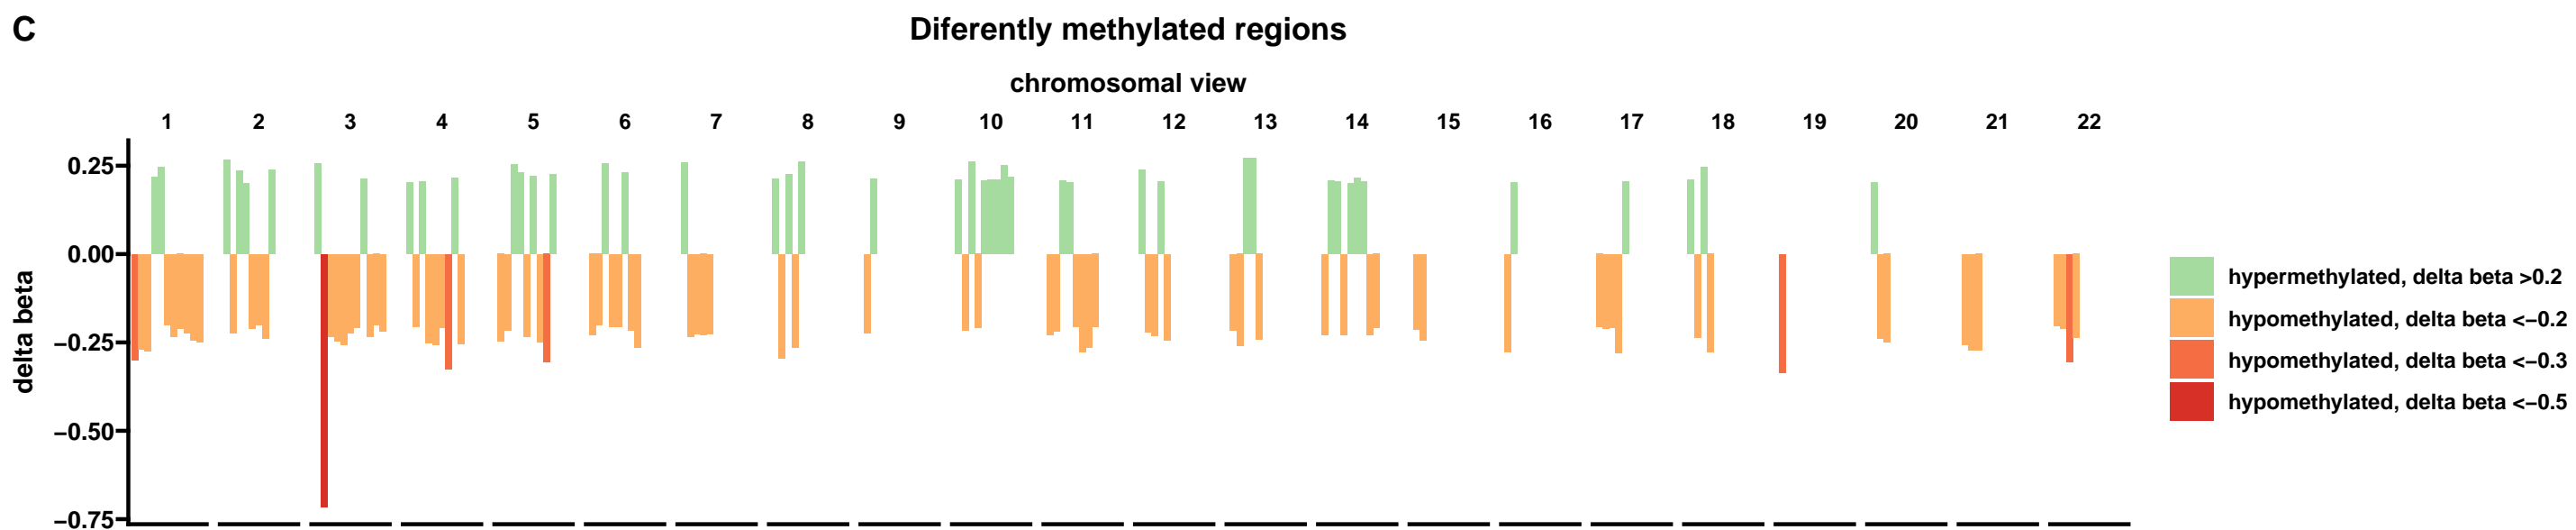

D

Relative to CpG islands

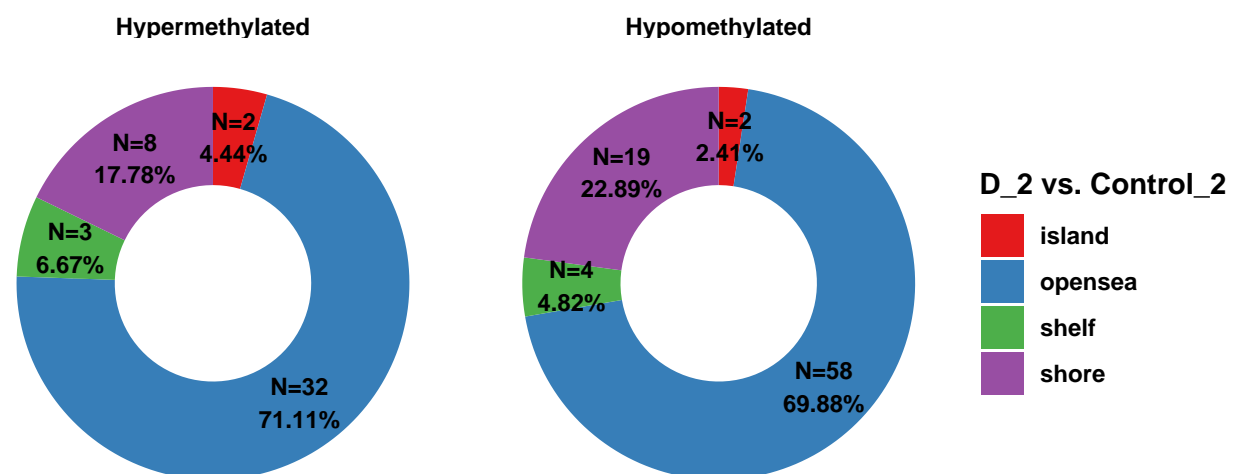

E

Relative to TSS

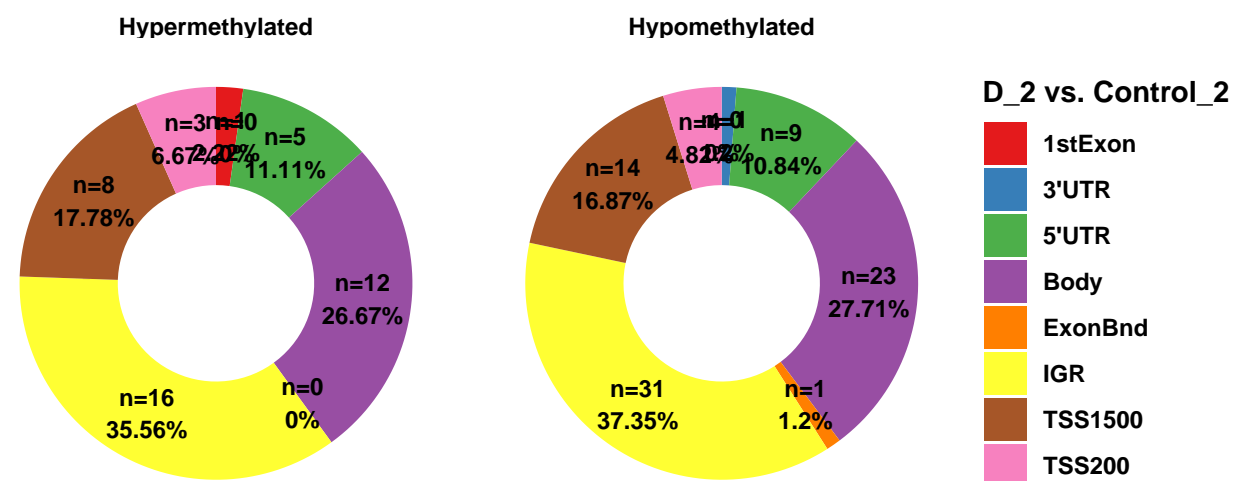

Supplement: s1 [file s1]

A

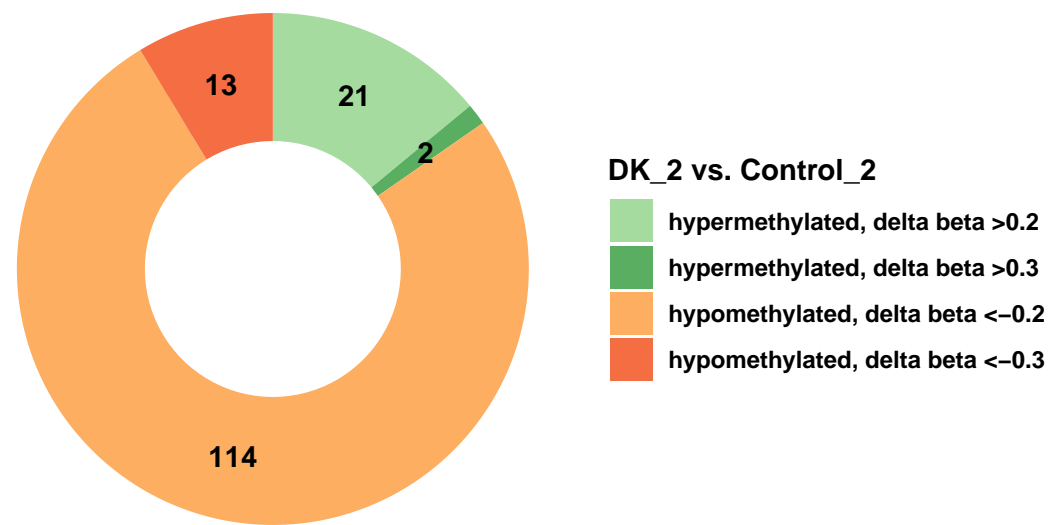

B

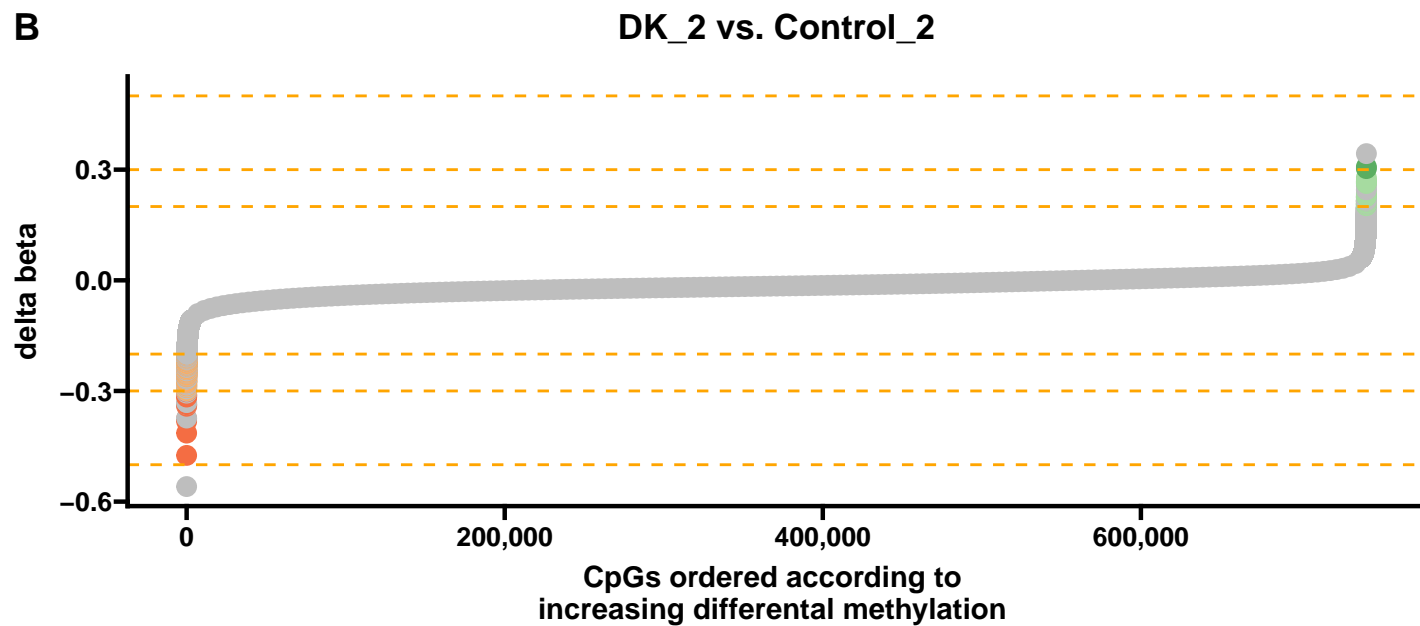

C

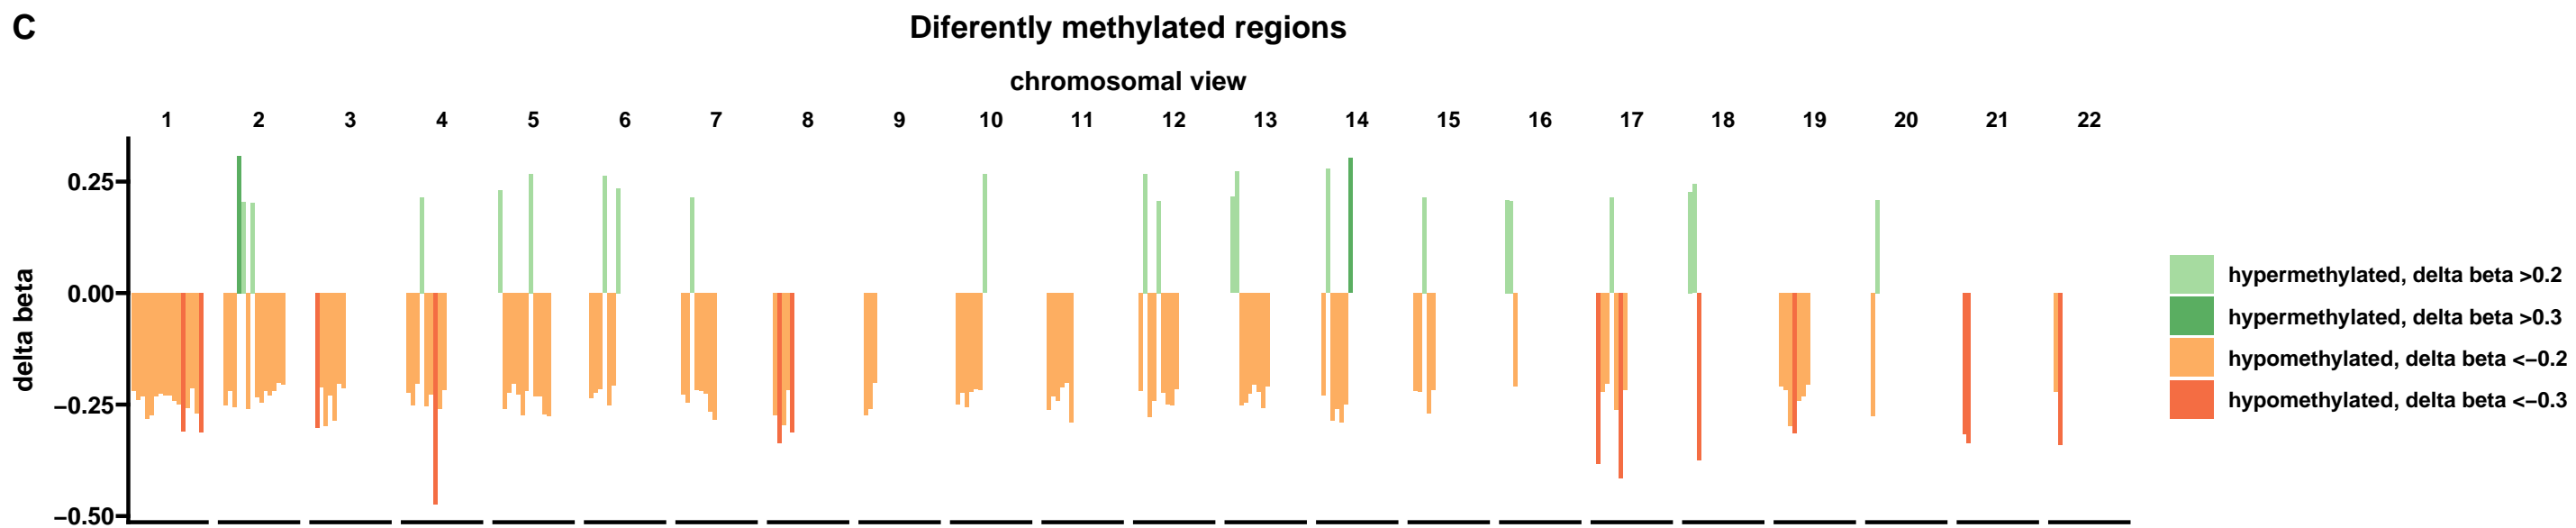

D Relative to CpG islands

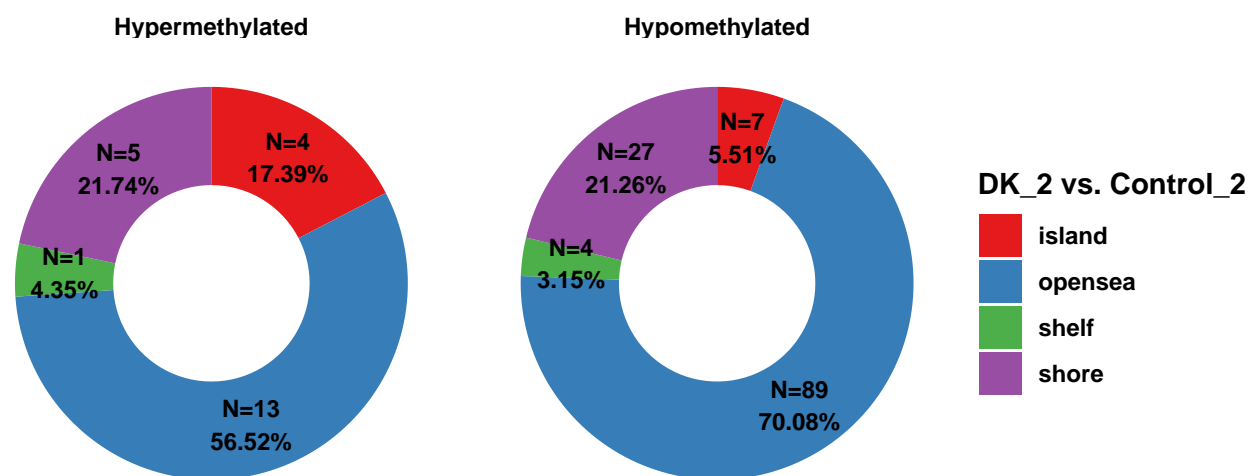

E Relative to TSS

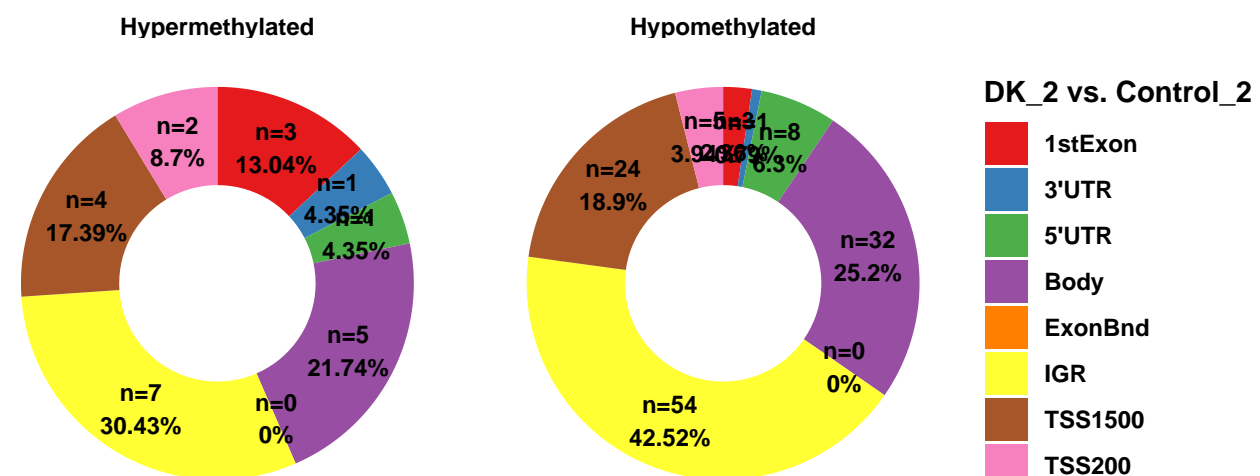

Supplement: s1 [file s1]
